# Supplementary material
Source: Research Square preprint supplement (doi:10.21203/rs.3.rs-9050886/v1)
Supplement: Supplementary file 1 [file 91cfbece38f4852245ea84f6.docx]

**Table 1**. Participants' demographic profile

| Variable description | Females (n) | % | Males (n) | % | Total (n) | | % |
| --- | --- | --- | --- | --- | --- | --- | --- |
| Age category |  |  |  |  |  |  | |
| - 18-19 - 20-21 - 22 -23 - 24-26 - 27-29 | 82  43  16  5  4 | 25.8  13.5  5.0  1.6  1.3 | 41  64  47  12  4 | 12.9  20  14.7  3.8  1.3 | 123  107  63  17  8 | 38.5  34.8 19.8  5.5  2.6 | |
|  |
| Year of study   - First year - Second year - Third year - Fourth year - Postgraduate | 64  55  27  0  4 | 20.1  17.2  8.5  0  1.3 | 48  50  44  23  4 | 15.0  15.7  13.8  7.2  1.3 | 112  105  71  23  8 | 35.1  32.9  23.3  7.2  2.5 | |
| Faculty   - Science, Engineering, and Agriculture - Humanities, Social Sciences, and Education - Management and Commerce Law - Health Sciences | 54  31  39  26 | 16.9  9.7  12.2  8.2 | 127  88  73  31 | 22.9  17.9  10.7  1.6 | 127  88  73  31 | 39.8  27.6  22.9  9.7 | |
|  |  |  |  |  |  |  | |
| Funding   - Funded - Self-funded | 159  11 | 43.6  3.4 | 159  10 | 49.8  3.1 | 298  21 | 93.4  6.6 | |
| Type of Residence   - Campus - Off campus | 80  70 | 25.1  21.9 | 61  108 | 19.1  33.9 | 141  178 | 44.2  55.8 | |
| Ability to Plan a Budget   - Yes - No | 85  65 | 26.6  20.4 | 110  59 | 34.5  18.5 | 195  124 | 61.1  38.9 | |
| Monthly Food Expenditure   - R100 - R500 - R501 - R1000 - R1001 - R1500 - R1501 - R2000 - R2001 - R2500 - R2501 - R3000 - R3001 - R3500 | 4  91  44  10  0  0  1 | 2.6  60.6  29.3  6.6  0  0  0.6 | 6  93  38  24  2  3  0 | 3.6  56.0  22.9  14.5  1.2  1.8  0 | 10  184  82  34  2  3  1 | 3.2  58.2  25.9  10.8  0.6  0.9  0.3 | |
| Grocery List Compilation   - Yes - No | 122  28 | 38.2  8.8 | 104  65 | 32.6  20.4 | 226  93 | 70.8  29.2 | |
